# Supplementary material for: Sharing biodiversity data: citizen scientists’ concerns and motivations
Source: Springer Nature journal article supplement (doi:10.1007/s10531-017-1391-z), 2017-06-16
Supplement: MOESM1 [file 12449938]

**What would you like to get more information about from the organisations or projects that you're involved in as a recorder?**

|                                                           | I already get enough information about this | I'd like more information about this | I'm not interested in information about this |
|-----------------------------------------------------------|---------------------------------------------|--------------------------------------|----------------------------------------------|
| Information on new or special sightings                   | <input type="radio"/>                       | <input type="radio"/>                | <input type="radio"/>                        |
| Information on activities                                 | <input type="radio"/>                       | <input type="radio"/>                | <input type="radio"/>                        |
| Information on scientific research                        | <input type="radio"/>                       | <input type="radio"/>                | <input type="radio"/>                        |
| Information on (new) relevant nature policy               | <input type="radio"/>                       | <input type="radio"/>                | <input type="radio"/>                        |
| Information on how best to do nature recording            | <input type="radio"/>                       | <input type="radio"/>                | <input type="radio"/>                        |
| Technical information on submitting and editing sightings | <input type="radio"/>                       | <input type="radio"/>                | <input type="radio"/>                        |
| Information on ownership of submitted records             | <input type="radio"/>                       | <input type="radio"/>                | <input type="radio"/>                        |

**At which places do you record nature? (Multiple answers allowed)**

- A self-selected area (inventory)
- An area chosen in collaboration with an involved organisation (plot or sampling point)
- In my own garden
- Anywhere I see something
- Abroad

**With whom do you usually do your nature recording? (Choose up to 2 answers)**

- (Usually) alone
- (Usually) in a group
- (Usually) with my family

\* If (for instance) you record in a group just as often as alone, you may choose both answers

**What do you do when you doubt a sighting? (Multiple answers allowed)**

- I just submit the sighting
- I don't submit the sighting
- I consult a field guide
- I look it up on the internet
- I consult the forum of waarneming.nl
- I consult another recorder
- I consult an expert
- I contact a nature organisation
- Other, namely...

**How do you stay up to date on species and their distribution? (Multiple answers allowed)**

- I use self-study (using field guides, handbooks, the internet, etc.)
- I participate in excursions or training courses
- I participate in identification days
- I discuss it with other volunteer recorders
- I personally contact experts
- I don't
- Other, namely....

**Motivations**

We would now like to ask you a few questions about what drives you to do nature recording, and how you view nature. We would like to know more about the motivations and experience of volunteer recorders. Don't think too long about each statement; follow your intuition.

**For the following motivations for recording nature, could you choose those that are of importance to you (left)? You can then rank them (right), with the motivation that is most important for you on top.**

|                                                                                                                                                                                                                                                                                                                                                                                                             |  |
|-------------------------------------------------------------------------------------------------------------------------------------------------------------------------------------------------------------------------------------------------------------------------------------------------------------------------------------------------------------------------------------------------------------|--|
| Learning more about nature<br>Being connected to nature<br>Being attached to an area<br>Gives meaning to my life<br>Spending time outdoors<br>Working together with people<br>Determines who I am<br>For future generations<br>Taking pleasure in doing something I'm good at<br>See as many different species as possible<br>Contributing to science<br>Contributing to nature conservation and management |  |
|-------------------------------------------------------------------------------------------------------------------------------------------------------------------------------------------------------------------------------------------------------------------------------------------------------------------------------------------------------------------------------------------------------------|--|

\* You may choose as many motivations as you like, whether that is 1 or 12

**\*\*NOTE FROM THE AUTHORS: the 12 motivations were ordered randomly for each respondent**

**How important do you expect your sightings to be for the following purposes:**

|                                               | Not important at all  | Not very important    | Neutral               | Important             | Very important        | I really don't know   |
|-----------------------------------------------|-----------------------|-----------------------|-----------------------|-----------------------|-----------------------|-----------------------|
| For nature conservation in my own environment | <input type="radio"/> |
| For nature conservation in the Netherlands    | <input type="radio"/> |
| For scientific research                       | <input type="radio"/> |
| For (spatial) policy                          | <input type="radio"/> |
| For my own knowledge about nature             | <input type="radio"/> |

**Along with recording**

We would like to ask you a few questions about what you do during and after your nature recording.

**Which of the following actions have you ever carried out along with recording, and which would you ever be prepared to do?**

|                                                                                          | I've done this        | I've never done this, but I might be prepared to | I've never done this, and I'm not prepared to either |
|------------------------------------------------------------------------------------------|-----------------------|--------------------------------------------------|------------------------------------------------------|
| Report offences in natural areas                                                         | <input type="radio"/> | <input type="radio"/>                            | <input type="radio"/>                                |
| Contribute to nature management (e.g. pollarding trees, pruning shrubs or pulling weeds) | <input type="radio"/> | <input type="radio"/>                            | <input type="radio"/>                                |
| Make a financial contribution to nature development or conservation                      | <input type="radio"/> | <input type="radio"/>                            | <input type="radio"/>                                |
| Participate in discussing nature policy                                                  | <input type="radio"/> | <input type="radio"/>                            | <input type="radio"/>                                |
| Take plants or animals with me for identification                                        | <input type="radio"/> | <input type="radio"/>                            | <input type="radio"/>                                |
| Collect dead animals                                                                     | <input type="radio"/> | <input type="radio"/>                            | <input type="radio"/>                                |

## Sharing data

For the last topic, we would like to know how you feel about ownership and use of submitted data.

**When you submit sightings, who owns these data in your opinion?**

- The data are my property
- The data are the property of the organisation I submit them to
- The data are nobody's property (public good)
- I really don't know

**(Optional) Are there certain goals for which you don't want your submitted records to be used?**

**Under which conditions do you feel your sightings ought to be used by other users than the organisation that manages the data?**

- My data may be used by anyone unconditionally
- My data may be used by anyone, but I, or the organisation managing the data, should always be attributed (when technically possible)
- My data may be used by anyone, but with attribution as in the previous option, and not for financial gain
- I leave that to the organisation managing the data
- No opinion
- Other, namely...

**(Optional) Does your answer to the previous question depend on the type of sighting?**

**If your sightings are publicly accessible to anyone, how would you like to be visible as the recorder?**

- I want to be cited by name
- I want to be cited by a nickname
- I don't want to be visible as the recorder (anonymous)
- I don't care

**If your sightings are shared and/or used by others, would you like to be able to see this?**

- Yes
- No
- No opinion

## Demographic questions

Finally, we would like to know a few background characteristics from you.

**What is your year of birth?**

....

**Are you...**

- Male
- Female

**What is your highest education completed?**

- Primary school
- LBO / VBO / MAVO / VMBO
- MBO / HAVO / VWO
- HBO / University

**\*\*NOTE FROM THE AUTHORS: these acronyms refer to Dutch levels of education, and are difficult to translate**

**(Optional) To be able to map the geographic distribution of all volunteer recorders, we would like to ask you for the four numbers of your postcode. If you prefer not to provide these, feel free to skip this question.**

**Aside from volunteer nature recording, are you employed in the nature/environment sector? (Multiple answers allowed)**

- Yes, as a paid employee
- Yes, as a volunteer
- No
