# Supplementary material for: Sharing biodiversity data: citizen scientists’ concerns and motivations
Source: Springer Nature journal article supplement (doi:10.1007/s10531-017-1391-z), 2017-06-16
Supplement: MOESM2 [file 12449938]

### Supplementary Material 2: Residential location of respondents

A total of 1954 respondents (89.1% of the total sample) agreed to provide the four numbers of their postcode, which was used to create this figure in ArcGIS. Red dots indicate the relative number of respondents, grey dots indicate large cities.

Source files: © Kadaster / Centraal Bureau voor de Statistiek, 2015. Our thanks go to Stefan Vriend (Radboud University) for his assistance in making this figure.

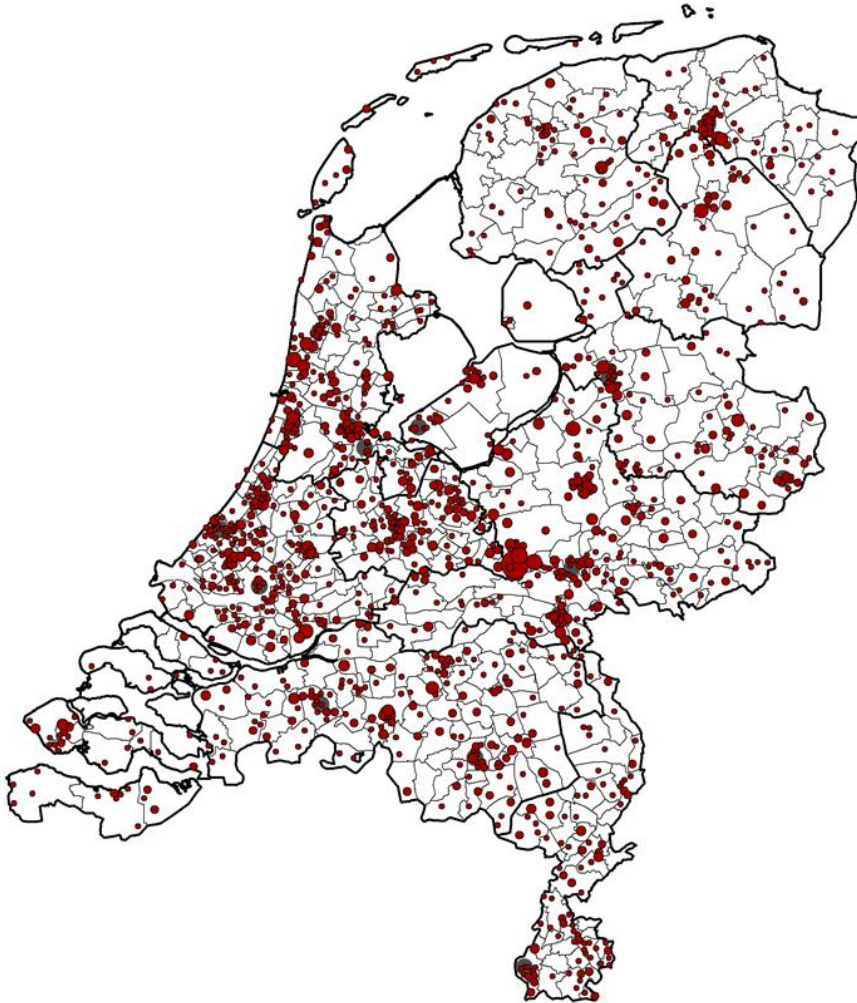

**Fig. S1** Residential location of respondents (adapted from Ganzevoort and van den Born 2016, p. 45)

### References

Ganzevoort W, van den Born RJG (2016) Citizen scientists: Een onderzoek naar de motivaties en visies op data delen van vrijwillige natuurwaarnemers [Citizen scientists: A study into the motivations and views on data sharing of volunteer nature recorders]. Institute for Science, Innovation and Society, Radboud University
